# Supplementary material
Source: Springer Nature journal article supplement (https://www.springermedizin.de/resource/supplementary/12936_2010_1608_MOESM1_ESM.pdf/9541862)

50

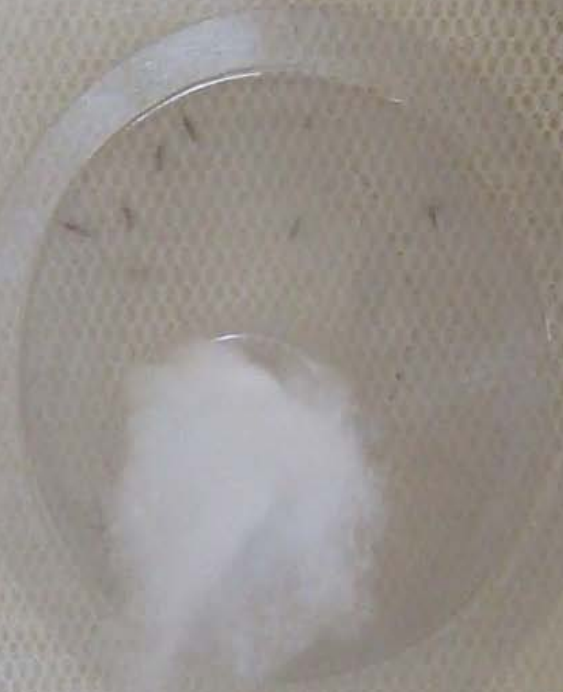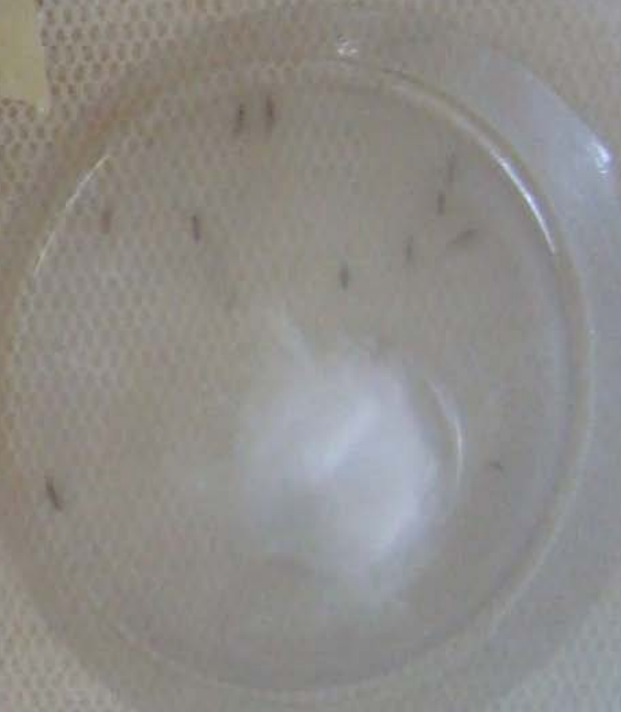

51

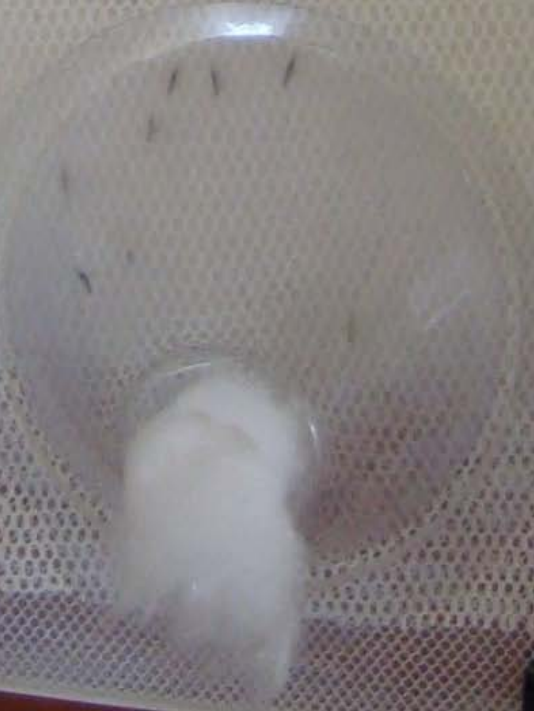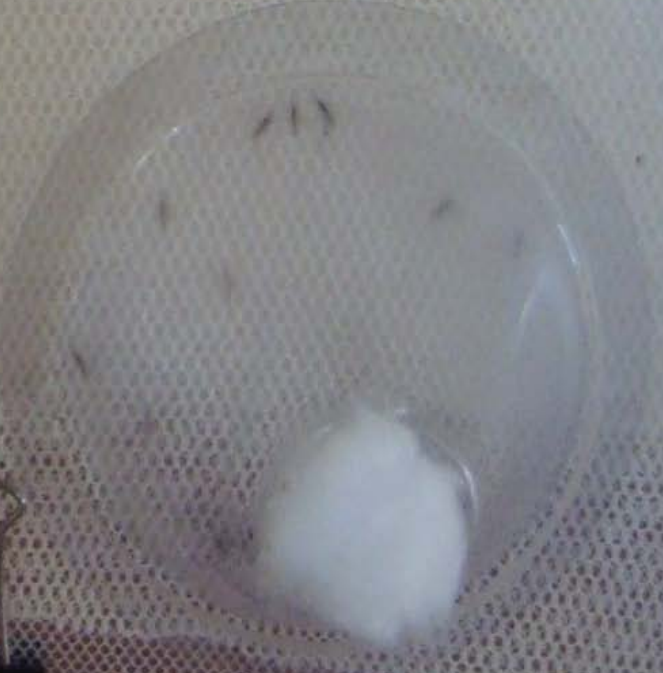

52

Supplement: MOESM1 [file 9541862]
